# Supplementary material
Source: PubMed Central journal article supplement (PMC9523554)

## Supplemental Online Content

Lee HI, Lee J, Lee JH, et al. Evaluation of optimal assessment schedules for surveillance after definitive locoregional treatment of locally advanced head and neck cancer: a retrospective cohort study with parametric modeling of event-free survival. *JAMA Otolaryngol Head Neck Surg*. Published online September 29, 2022. doi:10.1001/jamaoto.2022.2561

**eTable 1.** Recommendations for assessment schedule in head and neck cancer.

**eTable 2.** The overall incidence of event, progression, and primary malignancies in five subgroups.

**eFigure 1.** Parametric modeling of total events in (A) nasopharynx cancer, (B) HPV-positive oropharynx cancer, (C) HPV-negative oropharynx cancer, (D) Hypopharynx cancer, and (E) Larynx cancer

**eFigure 2.** Parametric modeling of local events in (A) nasopharynx cancer, (B) HPV-positive oropharynx cancer, (C) HPV-negative oropharynx cancer, (D) hypopharynx cancer, and (E) larynx cancer.

**eFigure 3.** Parametric modeling of distant events in (A) nasopharynx cancer, (B) HPV-positive oropharynx cancer, (C) HPV-negative oropharynx cancer, (D) hypopharynx cancer, and (E) larynx cancer.

This supplemental material has been provided by the authors to give readers additional information about their work.

**eTable 1. Recommendations for assessment schedule in head and neck cancer**

| <b>Year</b> | <b>NCCN</b> | <b>AHNS</b> | <b>ESMO</b> | <b>AIRO</b> | <b>BAHNO</b> | <b>SNUH</b> |
|-------------|-------------|-------------|-------------|-------------|--------------|-------------|
| 1           | 1–3 months  | 1–3 months  | 2–3 months  | 1–2 months  | 1–2 months   | 2–3 months  |
| 2           | 2–6 months  | 2–4 months  | 2–3 months  | 2–3 months  | 1–2 months   | 3–5 months  |
| 3           | 4–8 months  | 3–6 months  | 6 months    | 4–6 months  | 3–6 months   | 3–5 months  |
| 4           | 4–8 months  | 3–6 months  | 6 months    | 4–6 months  | 3–6 months   | 6 months    |
| 5           | 4–8 months  | 3–6 months  | 6 months    | 4–6 months  | 3–6 months   | 6 months    |
| >5          | 12 months   | 12 months   | 12 months   | 6–12 months | 12 months    | –           |

Abbreviations: NCCN, National Comprehensive Cancer Network; AHNS, American Head and Neck Society; ESMO, European Society for Medical Oncology; AIRO, Associazione Italiana Radioterapia Oncologica; BAHNO, British Association of Head and Neck Oncologists; SNUH, Seoul National University Hospital; mo, months.

**eTable 2. The overall incidence of event, progression, and 2<sup>nd</sup> primary malignancies in five subgroups.**

|                                      | <b>Nasopharynx<br/>(n=227)</b> | <b>HPV-positive<br/>oropharynx<br/>(n=237)</b> | <b>HPV-negative<br/>oropharynx<br/>(n=47)</b> | <b>Hypopharynx<br/>(n=65)</b> | <b>Larynx<br/>(n=97)</b> |
|--------------------------------------|--------------------------------|------------------------------------------------|-----------------------------------------------|-------------------------------|--------------------------|
| Total events                         | 43 (18.9%)                     | 35 (14.8%)                                     | 17 (36.2%)                                    | 29 (44.6%)                    | 30 (30.9%)               |
| Local events                         | 24 (10.6%)                     | 22 (9.3%)                                      | 11 (23.4%)                                    | 20 (30.8%)                    | 19 (19.6%)               |
| Distant events                       | 29 (12.8%)                     | 20 (8.4%)                                      | 10 (21.3%)                                    | 16 (24.6%)                    | 18 (18.6%)               |
| Total progression                    | 39 (17.2%)                     | 30 (12.7%)                                     | 15 (31.9%)                                    | 29 (44.6%)                    | 21 (21.7%)               |
| Local progression                    | 23 (10.1%)                     | 21 (8.9%)                                      | 11 (23.4%)                                    | 20 (30.8%)                    | 19 (19.6%)               |
| Distant progression                  | 26 (11.5%)                     | 14 (5.9%)                                      | 8 (17.0%)                                     | 16 (24.6%)                    | 9 (9.3%)                 |
| 2 <sup>nd</sup> primary malignancies | 5 (2.2%)                       | 7 (3.0%)                                       | 2 (4.3%)                                      | 1 (1.5%)                      | 9 (9.3%)                 |

**eFigure 1. Parametric modeling of total events in (A) Nasopharynx Cancer, (B) HPV-Positive Oropharynx Cancer, (C) HPV-Negative Oropharynx Cancer, (D) Hypopharynx Cancer, and (E) Larynx Cancer**

The total event-free survival curves were converted to standardized curves and divided into three phases for regular follow-up (1st phase, 6.0–16.5 months; 2nd phase, 16.5–25.0 months; 3rd phase 25.0–99.0 months). Recommended follow-up intervals of each phase are presented in the table below.

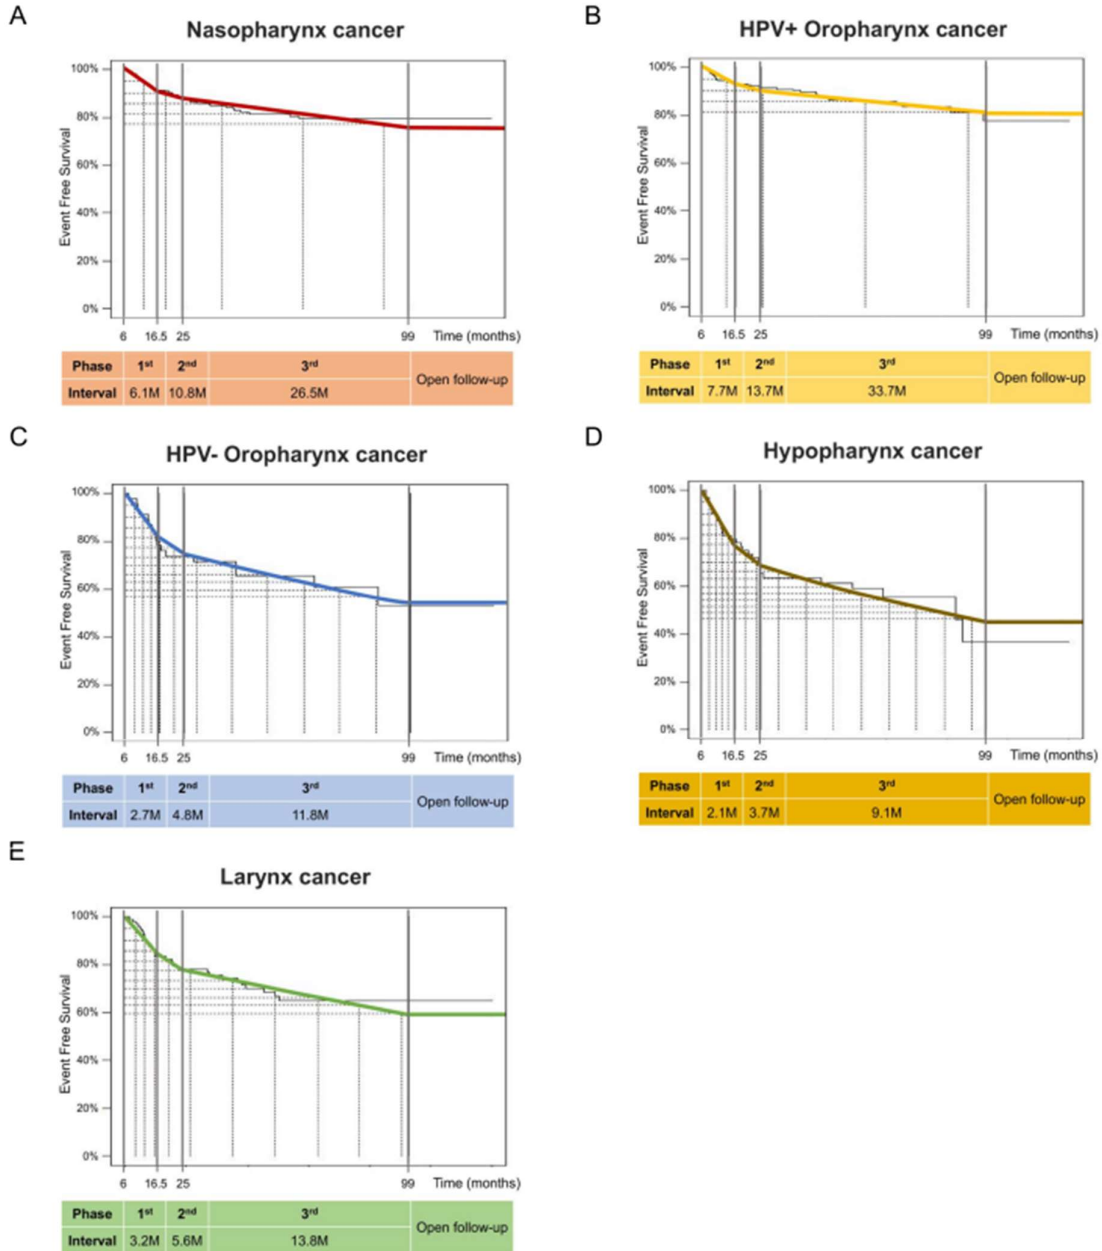

**Figure 2. Parametric modeling of local events in (A) nasopharynx cancer, (B) HPV+ oropharynx cancer, (C) HPV- oropharynx cancer, (D) hypopharynx cancer, and (E) larynx cancer.** The local event-free survival curves were divided into three phases (1<sup>st</sup> phase, 6.0–16.5 months; 2<sup>nd</sup> phase, 16.5–25.5 months; 3<sup>rd</sup> phase 25.5–99.0 months). Recommended follow-up intervals of each phase are presented in the table below.

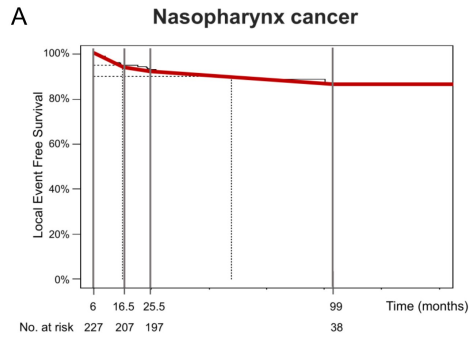

| Phase    | 1 <sup>st</sup> | 2 <sup>nd</sup> | 3 <sup>rd</sup> | Open follow-up |
|----------|-----------------|-----------------|-----------------|----------------|
| Interval | 9.9M            | 22.7M           | 51.8M           |                |

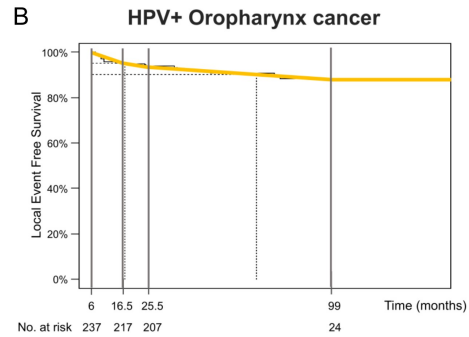

| Phase    | 1 <sup>st</sup> | 2 <sup>nd</sup> | 3 <sup>rd</sup> | Open follow-up |
|----------|-----------------|-----------------|-----------------|----------------|
| Interval | 10.8M           | 24.7M           | 56.4M           |                |

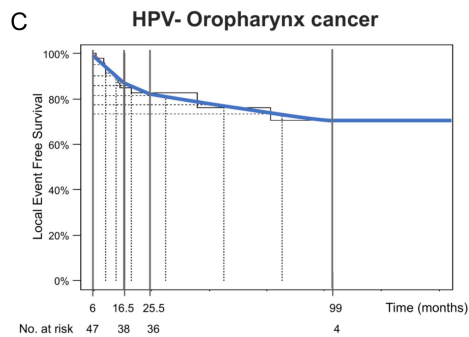

| Phase    | 1 <sup>st</sup> | 2 <sup>nd</sup> | 3 <sup>rd</sup> | Open follow-up |
|----------|-----------------|-----------------|-----------------|----------------|
| Interval | 3.9M            | 8.8M            | 20.2M           |                |

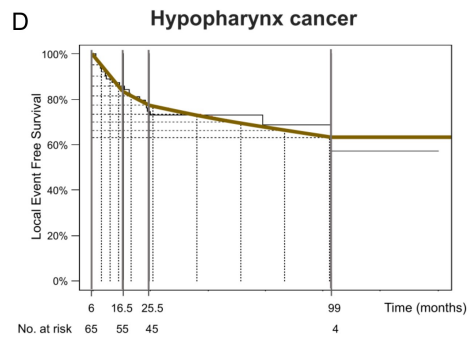

| Phase    | 1 <sup>st</sup> | 2 <sup>nd</sup> | 3 <sup>rd</sup> | Open follow-up |
|----------|-----------------|-----------------|-----------------|----------------|
| Interval | 2.9M            | 6.7M            | 15.3M           |                |

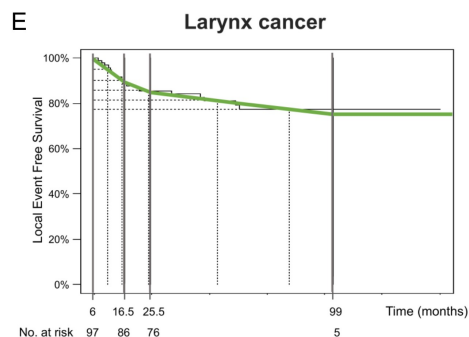

| Phase    | 1 <sup>st</sup> | 2 <sup>nd</sup> | 3 <sup>rd</sup> | Open follow-up |
|----------|-----------------|-----------------|-----------------|----------------|
| Interval | 4.7M            | 10.8M           | 24.7M           |                |

**eFigure 3. Parametric modeling of distant events in (A) nasopharynx cancer, (B) HPV+ oropharynx cancer, (C) HPV- oropharynx cancer, (D) hypopharynx cancer, and (E) larynx cancer.** The distant event-free survival curves were divided into two phases (1st phase, 6.0–27.5 months; 2nd phase, 27.5–99.0 months). Recommended follow-up intervals of each phase are presented in the table below.

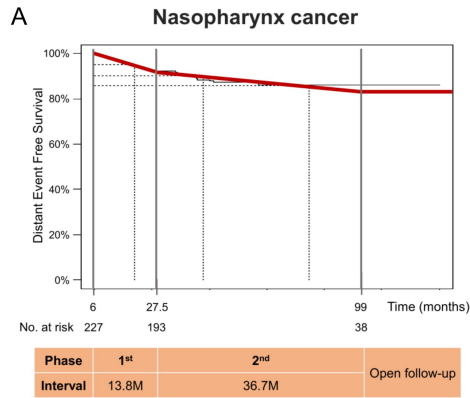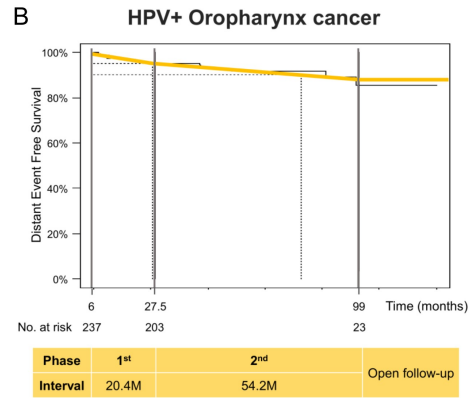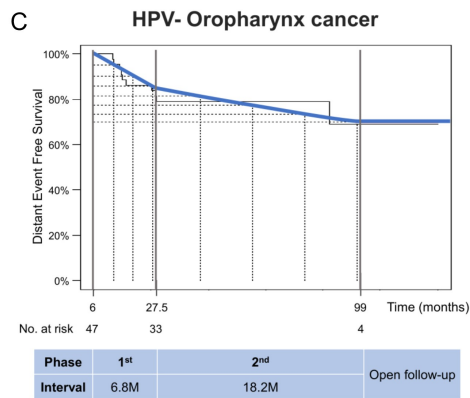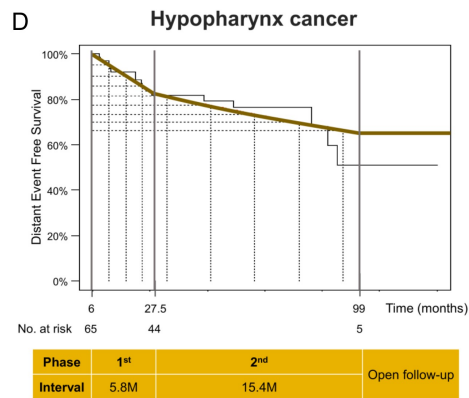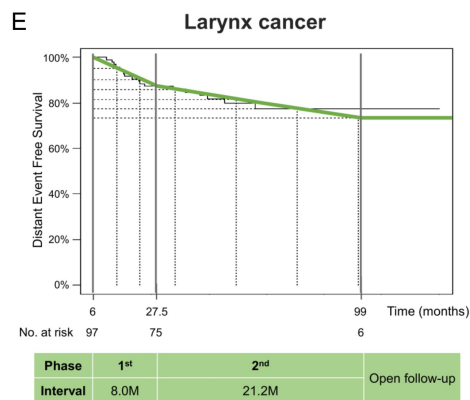

Supplement: jamaotolaryngolheadnecksurg-e222561-s001.pdf [file jamaotolaryngolheadnecksurg-e222561-s001.pdf]
